# Supplementary material for: Debondable phenoxy-based structural adhesives with β-amino amide containing reversible crosslinkers
Source: Royal Society of Chemistry journal article supplement (doi:10.1039/d4lp00369a), 2025-01-01
Supplement: d4lp00369a1.pdf [file d4lp00369a1.pdf]

## SUPPLEMENTARY INFORMATION

### **Debondable phenoxy-based structural adhesives with $\beta$ -amino amides containing reversible crosslinkers**

Francesca Portone<sup>a</sup>, Loc Tan Nguyen<sup>b</sup>, Roberta Pinalli<sup>a</sup>, Alessandro Pedrini<sup>a</sup>, Filip Du Prez<sup>b\*</sup>, Enrico Dalcanale<sup>a\*</sup>

a. Dipartimento di Scienze Chimiche, della Vita e della Sostenibilità Ambientale, Università degli Studi di Parma, Parco Area delle Scienze 17/A, 43124, Parma, Italy.

b. Polymer Chemistry Research Group, Centre of Macromolecular Chemistry (CMaC), Department of Organic and Macromolecular Chemistry, Faculty of Sciences, Ghent University, Krijgslaan 281 S4, 9000 Ghent, Belgium.

\* Email: enrico.dalcanale@unipr.it , Filip.DuPrez@Ugent.be

## Materials and methods

Methyl acrylate (stabilized with MEHQ, 99%), trimethyl hexamethylenediamine (2,2,4- and 2,4,4-mixture, TMHD, 99%) were purchased from TCI Chemicals Europe. 4,4'-trimethylene dipiperidine (97%, TMHD), 2-(1-piperazinyl)ethylamine (PEA), triethylenetetramine (TETA) were purchased from Sigma Aldrich. Epikote 828-LV (epoxy equivalent of approximately 185 g/equivalent) was provided by Westlake Epoxy. Ancamide 3030 curing agent (amine equivalent of 95 g/{H}) was provided by Evonik. Priamine 1074 was provided by Croda. All chemicals and solvents were used without further purification unless stated otherwise.

*Nuclear magnetic resonance (NMR)* spectra were recorded on a Bruker Advance Ultrashield 300 MHz spectrometer. Deuterated chloroform  $\text{CDCl}_3$  was used as solvent. Chemical shifts are given in parts per million (ppm).

*Attenuated total reflection-Fourier transform infrared spectroscopy (ATR-FTIR)* spectra were measured using a Perkin-Elmer Spectrum1000 FTIR infrared spectrometer with a diamond ATR probe.

*Thermogravimetric analyses (TGA)* were performed with a Mettler Toledo TGA/SDTA851e instrument under air atmosphere at a heating rate of  $10\text{ }^\circ\text{C}\cdot\text{min}^{-1}$  from 30 to  $800\text{ }^\circ\text{C}$  for the ramp or at  $200\text{ }^\circ\text{C}$  for 1 h for the isothermal measurement.

*Differential scanning calorimetry (DSC)* analyses were performed with a Mettler Toledo instrument 1/700 under air atmosphere at a heating rate of  $10\text{ }^\circ\text{C}\cdot\text{min}^{-1}$  from 0 to  $200\text{ }^\circ\text{C}$ .

*Rheology experiments* were performed on an Anton Paar MCR 302. The experiments were performed in parallel plate geometry using 8 mm sample disks. Amplitude sweep experiments were performed using a frequency of 1 Hz, a constant force of 1 N, and a variable shear strain that was ramped up logarithmically from 0.01% to 10% to observe the linear viscoelastic region. Stress-relaxation experiments were performed using a constant shear strain within the linear viscoelastic region of the samples, and a constant force of 1 N. The obtained characteristic relaxation time ( $\tau^*$ ), using the stretched Maxwell model, was used to calculate the activation energy.

*Tensile tests* were performed on a Tinius-Olsen H10KT tensile tester, equipped with a 5 kN load cell, at a speed of  $10\text{ mm}\cdot\text{min}^{-1}$ , and with a pre-load of 0.05 N. Flat dog bone type samples, prepared by

a Ray-Ran dog bone cutter, with an effective gauge length of 13 mm, a width of 2 mm and a thickness of around 1-2 mm using ASTM standard type IV dog bones (ISO 527-2- 2B) were used for the tensile tests.

*(Re)processability* was investigated by cutting the material in small pieces, which were then placed into a rectangular mold for compression molding. This assembly was placed in a preheated compression press (200 °C) for 1 min under 0.5 tonnes/m<sup>2</sup>. Then the pressure was increased to 3 tonnes/m<sup>2</sup> and kept constant for an additional 30 min.

*Solubility tests* were carried out in 40 mL of chloroform using 2 mm in diameter, 2 mm in thickness, and a weight of around 15-20 mg samples for 24 h at 25°C. The solvent was then removed, and the samples were dried under vacuum overnight at 60 °C. The soluble fraction and swelling ratio were calculated using equation **eq. S1** and equation **eq. S2**, respectively.

$$gel\ fraction\ (\%) = 1 - \frac{m_i - m_d}{m_i} \quad (eq. S1)$$

$$swelling\ ratio\ (\%) = \frac{m_s - m_i}{m_i} \quad (eq. S2)$$

with  $m_i$ ,  $m_s$ , and  $m_d$  representing the mass of initial, swollen, and dry samples, respectively.

*Creep recovery experiments* were performed at different temperatures (70-140 °C) using a constant normal force of 1 N. In the first 300 s, no shear stress was applied. Following this, a 2000 Pa shear stress was applied for 5000 s and a recovery period of 3600 s with no shear stress applied.

*Lap-shear tests* were performed on a Tinius-Olsen H10KT tensile tester, equipped with a 10 kN load cell, using ASTM D1002-05 standard test method for apparent shear strength of single-lap-joint adhesively bonded metal specimens by tension loading (metal-to-metal) at the test speed of 1.3 mm·min<sup>-1</sup>. Experiments were conducted at 20 – 25 °C with at least three samples for reproducible results.

### Dimethyl 3,3'-(propane-1,3-diylbis(piperidine-4,1-diyl))dipropionate

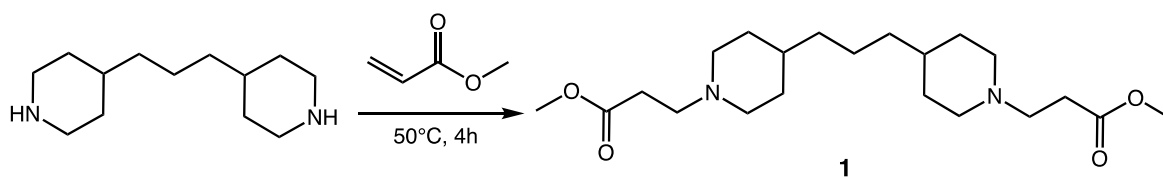

**Scheme S1.** Synthesis of BAE 1.

In a round bottom flask, 20 g of 4,4'-trimethylene dipiperidine (1 eq) was dissolved in 20 mL of methanol, then 28 mL of methyl acrylate (3 eq) was added using a dropping funnel to the reaction mixture. The reaction was conducted at 50 °C for 24 h. Afterwards, methanol and the excess of methyl acrylate was removed under vacuum distillation and compound **1** was obtained as a transparent liquid in quantitative yield.

**<sup>1</sup>H-NMR** (300 MHz, CDCl<sub>3</sub>) δ ppm: 3.61 (s, 6H), 2.79 (d, 4H), 2.60 (t, 4H), 2.45 (t, 4H), 1.87 (t, 4H), 1.59-1.57 (m, 4H), 1.21-1.09 (m, 12 H).

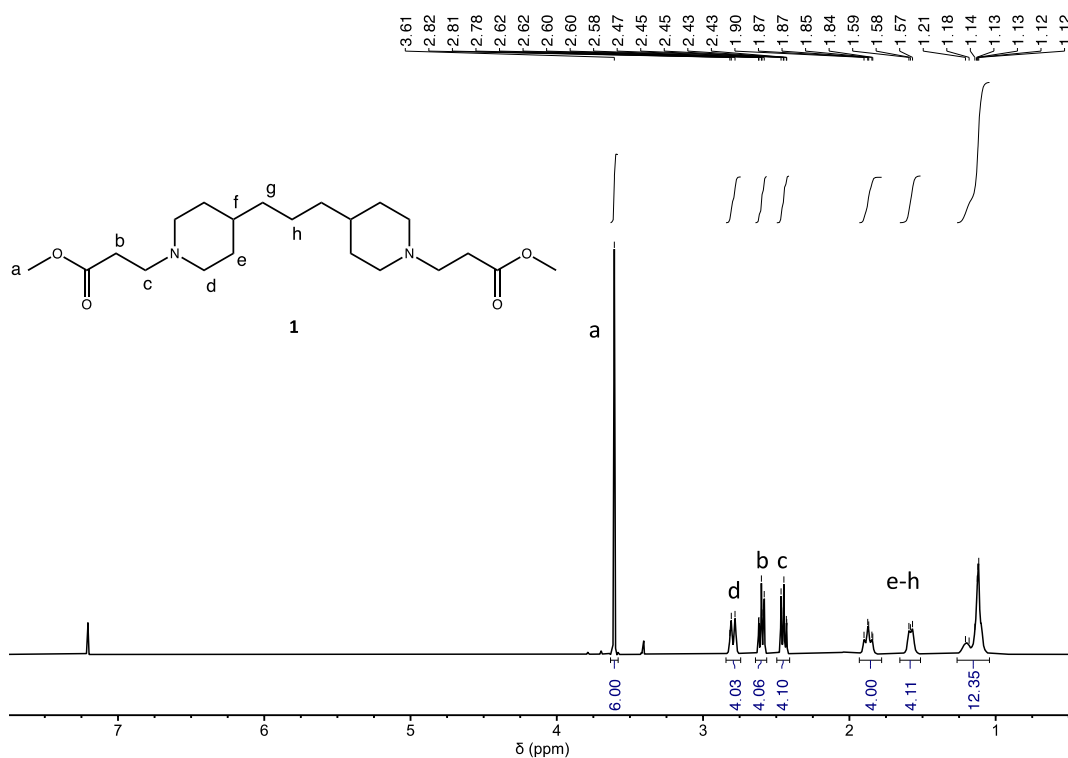

**Figure S1.** <sup>1</sup>H-NMR of compound **1** (CDCl<sub>3</sub>, 25 °C, 300 MHz).

## General procedure for curing agent

In a 20 mL propylene cup, compound **1** was mixed with the selected amines using a DAC 150.1 FVZ speed mixer (conditions of mixing: 2 min with a speed of 2500 rpm). The reaction was conducted at 120 °C for 24 h, then in a vacuum oven for an additional 16 h at 120 °C to completely remove the methanol generated from the reaction.

**Table S1.** Equivalent and grams used for the preparation of the crosslinkers.

|                | <b>BAE 1</b><br>(eq, g) | <b>Priamine</b><br>(eq, g) | <b>TETA (eq, g)</b> | <b>TMHD</b><br>(eq, g) | <b>PEA</b><br>(eq, g) | <b>AHEW</b><br>(g/mol) |
|----------------|-------------------------|----------------------------|---------------------|------------------------|-----------------------|------------------------|
| <b>BAA-T0</b>  | 1, 3                    | 1.08, 4.64                 | -                   | -                      | 0.12, 0,122           | 671.31                 |
| <b>BAA-T5</b>  | 1, 3                    | 0.57, 2.44                 | 0.06, 0.069         | 0.51, 0.633            | 0.06, 0.061           | 540.36                 |
| <b>BAA-T10</b> | 1, 3                    | 0.51, 2.19                 | 0.18, 0.206         | 0.45, 0.558            | 0.06, 0.061           | 882.87                 |

The amine hydrogen equivalent weight (AHEW) of BAA-T5 and BAA-T10 was calculated using Equation eq. S3, for BAA-T0 using Equation eq. S4:

$$AHEW = \frac{m_{Priamine} + m_{TETA} + m_{PEA} + m_{TMHD} + m_{BAE1}}{n_{BAE1} + n_{PEA} + 2n_{TETA}} \quad (\text{eq. S3})$$

$$AHEW = \frac{m_{Priamine} + m_{PEA} + m_{BAE1}}{n_{BAE1} + n_{PEA}} \quad (\text{eq. S4})$$

## Epoxy adhesive synthesis (E-BAAT0, E-BAAT5, E-BAAT10)

The dynamic crosslinkers were reacted with Epikote 828LV (epoxy to amine ratio-1:1) in a propylene cup using a DAC 150.1 FVZ speed mixer (conditions of mixing: 2 min with a speed of 2500 rpm). The curing of the network was performed in an oven at 80 °C for 16 h, then post-cured at 100 °C for 1 h. The same procedure was followed for the preparation of the reference epoxy material using Ancamide as a commercial hardener.

**Table S2.** Equivalent and grams used for the preparation of epoxy networks.

|                | <b>BAA-X (eq, g)</b> | <b>Epikote (eq, g)</b> |
|----------------|----------------------|------------------------|
| <b>E-BAAT0</b> | 1, 5.46              | 1, 1.5                 |

|                 |         |        |
|-----------------|---------|--------|
| <b>E-BAAT5</b>  | 1, 5.86 | 1, 2   |
| <b>E-BAAT10</b> | 1, 7.17 | 1, 1.5 |

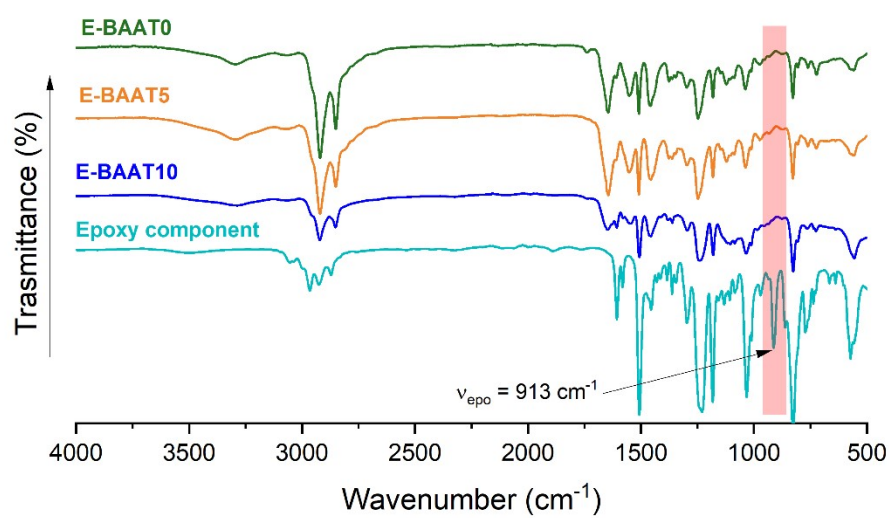

**Figure S2.** FTIR spectra of the dynamic epoxy networks E-BAAT0, E-BAAT5 and E-BAAT10.

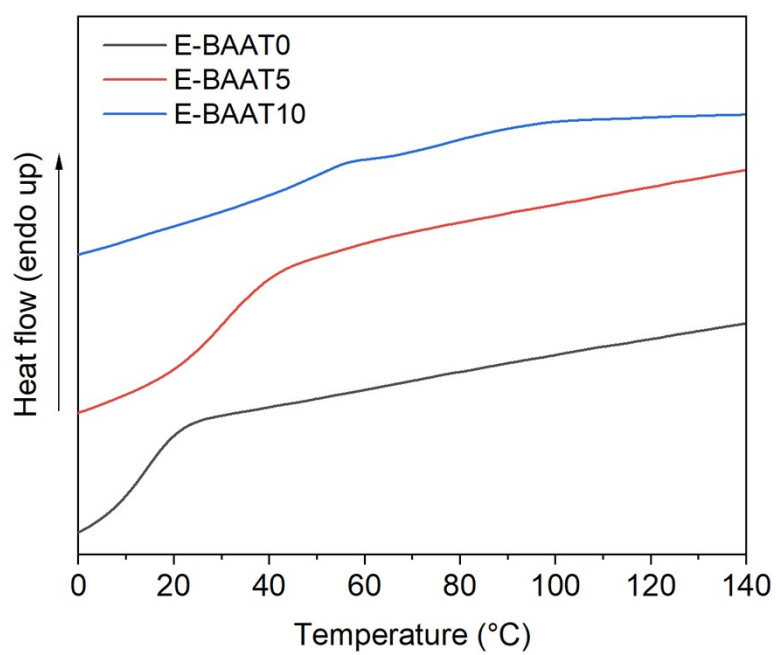

**Figure S3.** DSC curves performed at 10°C/min in air atmosphere of the epoxy network synthesized.

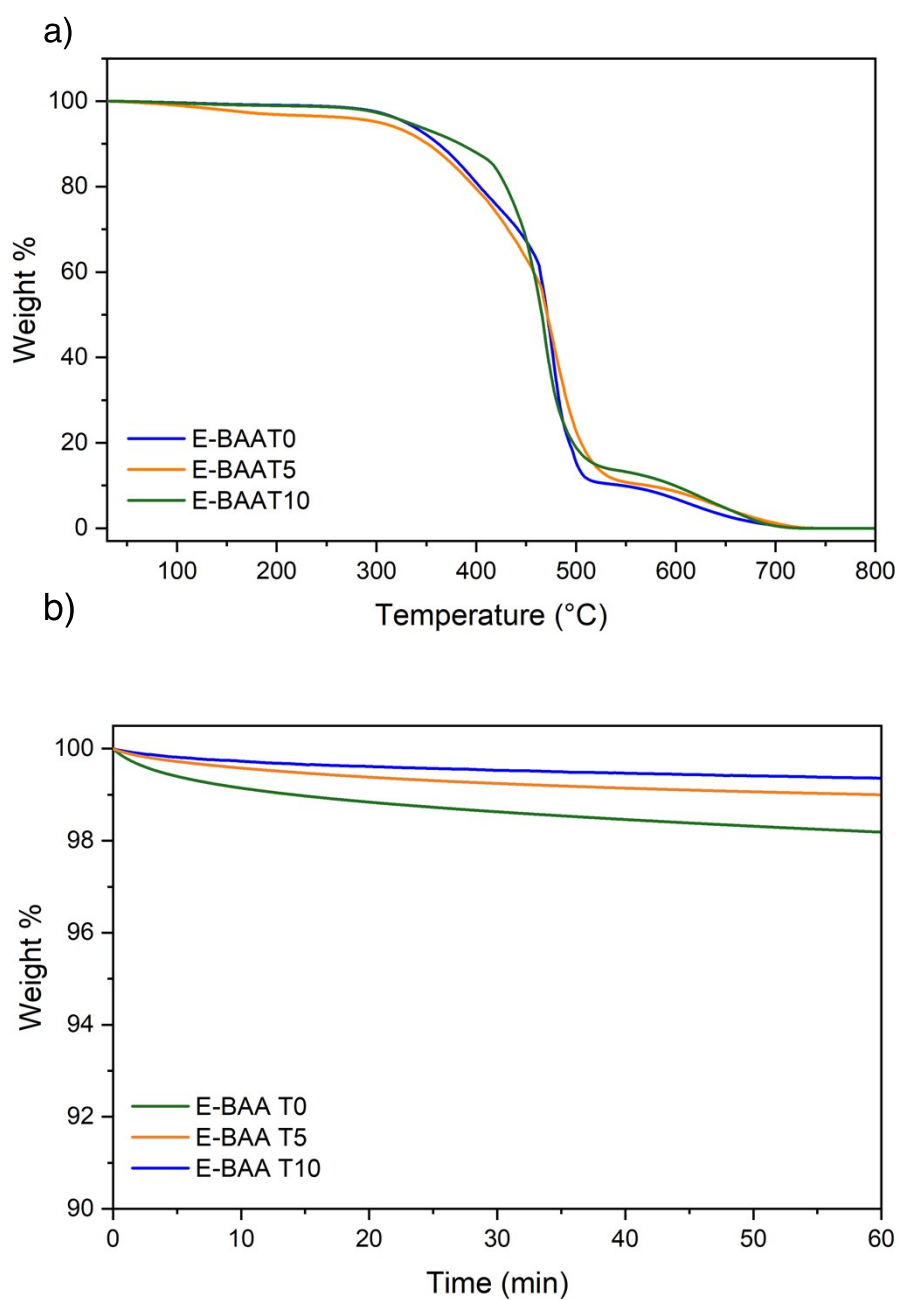

**Figure S4.** a) TGA performed at heating rate of 10 °C/min under air atmosphere; b) isothermal TGA curves performed at 200 °C for 1 h under air atmosphere.



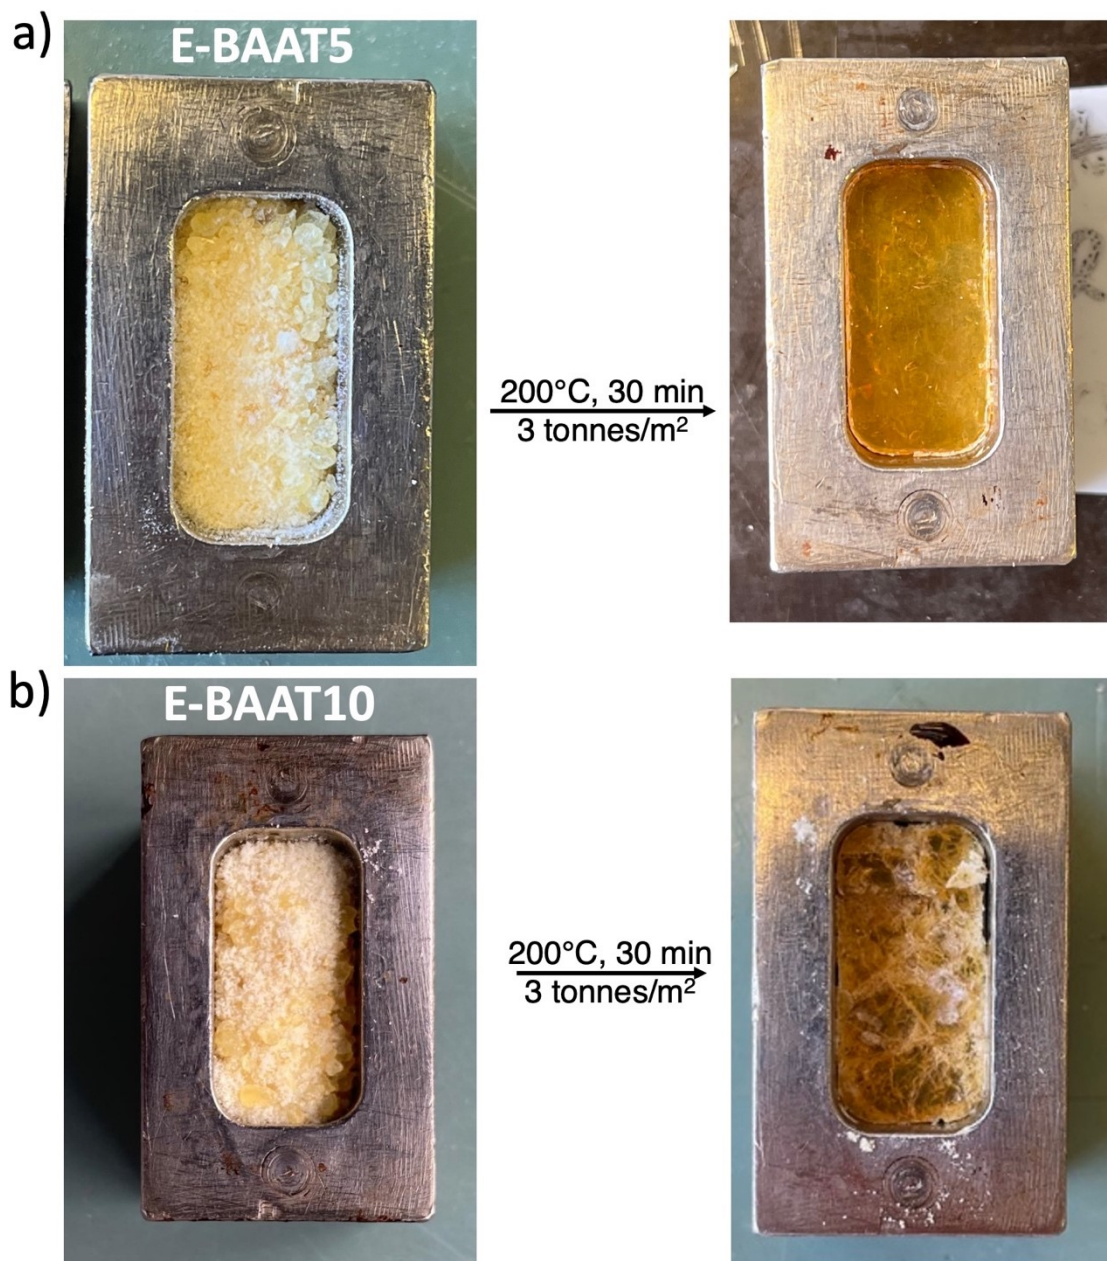

**Figure S5.** Picture of a) E-BAAT5 and b) E-BAAT10 before reprocessing test (left) and after the pressing at  $200^{\circ}\text{C}$  for 30 minutes under  $3 \text{ tonnes/m}^2$  of pressure. For E-BAAT10 only a partial healing of the initial powder is visible but not sufficient to obtain a homogenous sample.

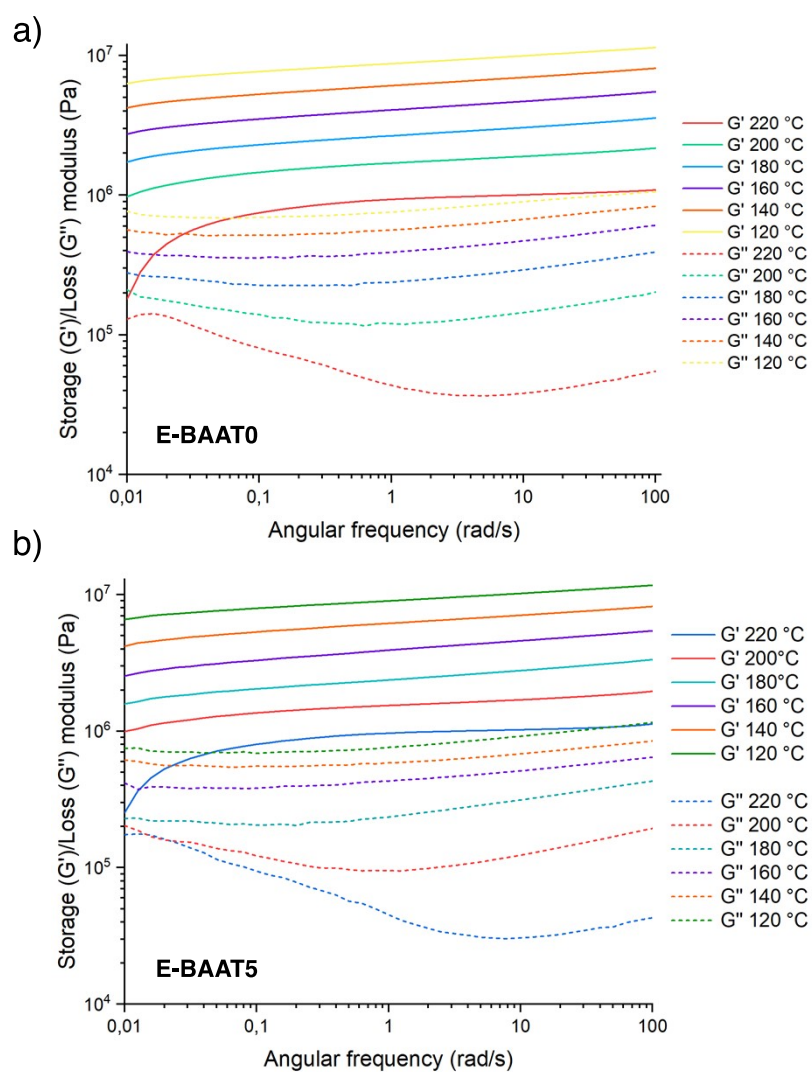

**Figure S6.** Frequency sweep experiment of (a) E-BAAT0 and (b) E-BAAT5 in a temperature range from 120 °C to 220 °C.

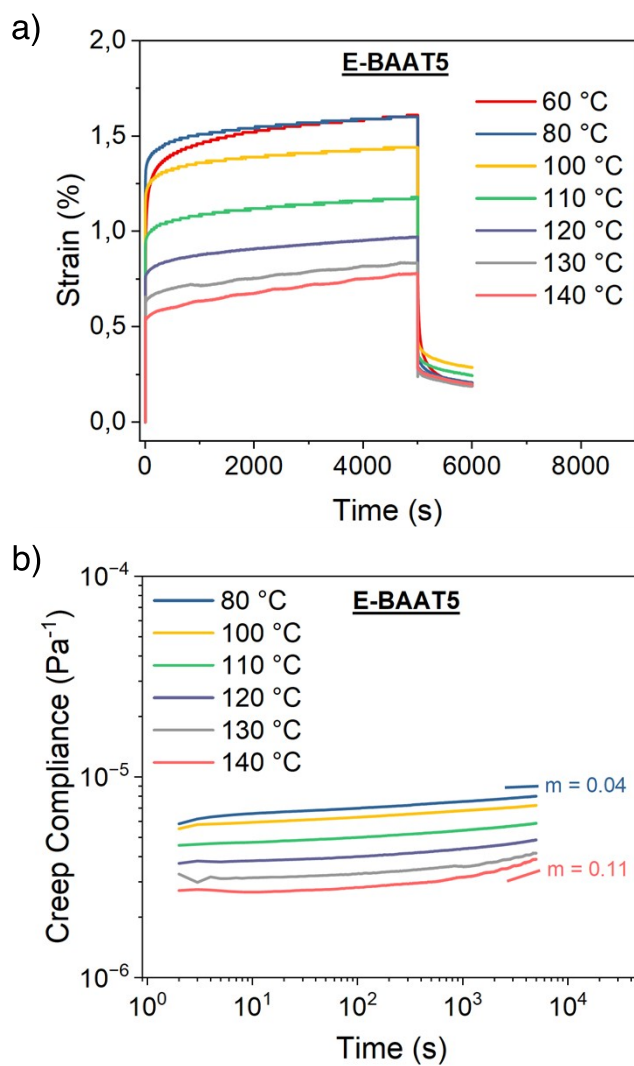

**Figure S7.** a) Creep recovery result of E-BAAT5; b) creep compliance vs time.

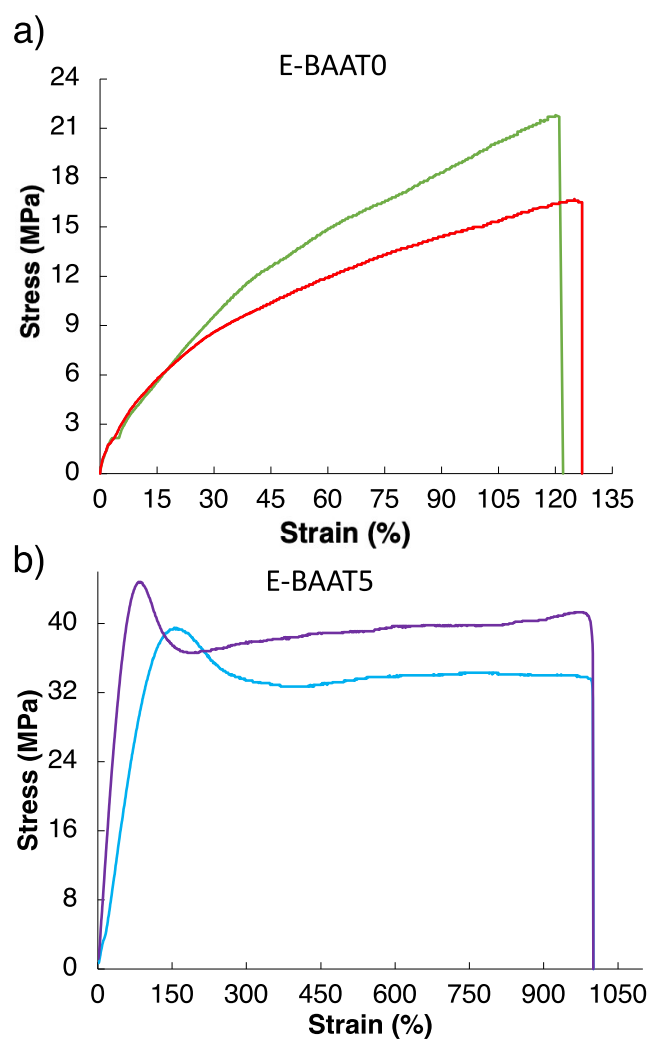

**Figure S8.** Tensile test performed on the dynamic networks a) E-BAAT0 and b) E-BAAT5.

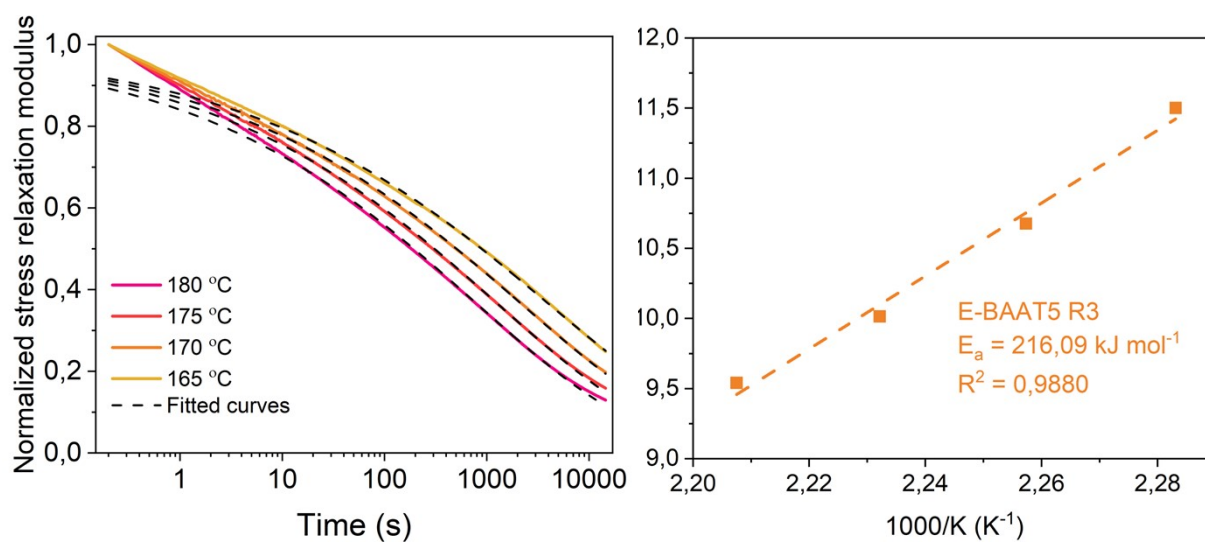

**Figure S9.** Stress relaxation curves (left) and Arrhenius plot (right) on E-BAAT5 after the third reprocessing cycle (R3).

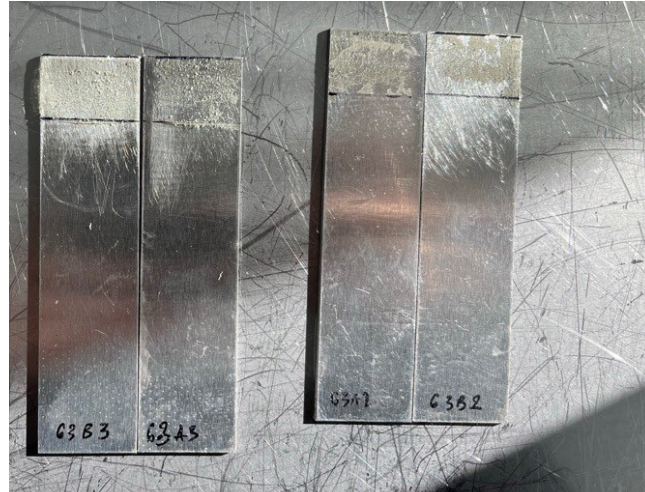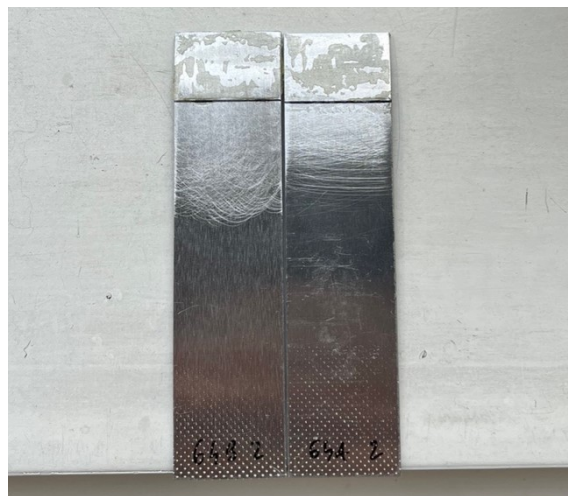

**Figure S10.** Pictures of E-BAAT0 (left) and E-BAAT5 (right) aluminum specimens after lap shear tests.



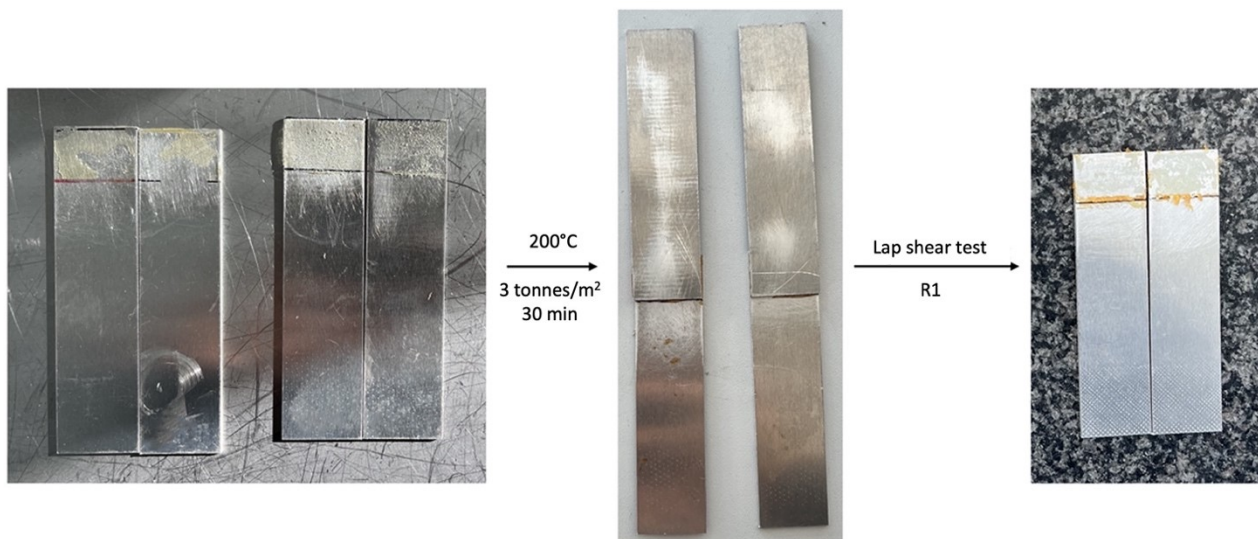

**Figure S11.** Pictures of broken specimens after lap shear test (left) of the dynamic epoxy materials. They were pressed together (middle) at 200 °C for 30 minutes under 3 tonnes/m<sup>2</sup> of pressure and tested again until failure (right).
